# Supplementary material for: Magnetic and electronic properties of magnetite across the high pressure anomaly
Source: PubMed Central journal article supplement (PMC6418096; doi:10.1038/s41598-019-41184-3), 2019-03-14
Supplement: 41598_2019_41184_MOESM1_ESM.pdf [file 41598_2019_41184_MOESM1_ESM.pdf]

# **Magnetic and electronic properties of magnetite across the high pressure anomaly**

D. P. Kozlenko<sup>1\*</sup>, L. S. Dubrovinsky<sup>2</sup>, S. E. Kichanov<sup>1</sup>, E. V. Lukin<sup>1</sup>, V. Cerantola<sup>3</sup>,  
A. I. Chumakov<sup>3</sup>, and B. N. Savenko<sup>1</sup>

<sup>1</sup> Frank Laboratory of Neutron Physics, Joint Institute for Nuclear Research, 141980 Dubna,  
Russia

<sup>2</sup> Bayerisches Geoinstitut, Universität Bayreuth, D-95440 Bayreuth, Germany

<sup>3</sup> European Synchrotron Radiation Facility, BP 220, F-38043 Grenoble, France

---

\* Corresponding author, e-mail [denk@nf.jinr.ru](mailto:denk@nf.jinr.ru)

**Supplementary Table 1.** The hyperfine parameters of magnetite at selected pressures and temperatures.

| $P, T$          | $IS_A$<br>(mm/s) | $IS_B$ (mm/s)                                              | $QS_A$<br>(mm/s) | $QS_B$ (mm/s)                                              | $H_{hfA}$ (T) | $H_{hfB}$ (T)                                              |
|-----------------|------------------|------------------------------------------------------------|------------------|------------------------------------------------------------|---------------|------------------------------------------------------------|
| 8 GPa           |                  |                                                            |                  |                                                            |               |                                                            |
| 290 K           | 0.28(4)          | 0.71(3)                                                    | -0.03(7)         | 0.04(8)                                                    | 48.4(2)       | 47.1(2)                                                    |
| 250 K           | 0.30(2)          | 0.72(2)                                                    | -0.07(4)         | 0.05(3)                                                    | 48.5(2)       | 47.4(1)                                                    |
| 200 K           | 0.34(2)          | 0.72(2)                                                    | -0.01(2)         | 0.03(2)                                                    | 49.1(2)       | 47.8(1)                                                    |
| 150 K           | 0.41(4)          | 0.77(3)                                                    | -0.01(6)         | -0.04(5)                                                   | 49.5(4)       | 48.1(2)                                                    |
| 100 K           | 0.41(4)          | 0.76(3)                                                    | 0.004(5)         | -0.02(4)                                                   | 49.6(2)       | 48.4(2)                                                    |
| 50 K            | 0.38(3)          | 0.82(5)                                                    | -0.03(7)         | -0.04(7)                                                   | 50.4(2)       | 50.3(2)                                                    |
| 10 K            | 0.29(5)          | 0.38(3) (Fe <sup>3+</sup> )<br>1.03(4) (Fe <sup>2+</sup> ) | 0.3(1)           | -0.6(1) (Fe <sup>3+</sup> )<br>-0.5(1) (Fe <sup>2+</sup> ) | 50.6(1)       | 50.5(1) (Fe <sup>3+</sup> )<br>50.5(2) (Fe <sup>2+</sup> ) |
| 21 GPa          |                  |                                                            |                  |                                                            |               |                                                            |
| 290 K           | 0.22(3)          | 0.63(2)                                                    | -0.04(5)         | -0.01(4)                                                   | 48.0(2)       | 47.2(2)                                                    |
| 250 K           | 0.29(3)          | 0.65(2)                                                    | 0.02(4)          | 0.01(4)                                                    | 48.2(2)       | 47.4(2)                                                    |
| 200 K           | 0.22(4)          | 0.70(3)                                                    | -0.08(8)         | -0.04(6)                                                   | 48.2(3)       | 47.9(2)                                                    |
| 150 K           | 0.35(4)          | 0.74(3)                                                    | -0.01(6)         | 0.01(6)                                                    | 48.5(2)       | 48.0(2)                                                    |
| 100 K           | 0.41(3)          | 0.77(4)                                                    | 0.00(5)          | 0.04(7)                                                    | 49.0(2)       | 47.8(2)                                                    |
| 50 K            | 0.43(3)          | 0.78(4)                                                    | -0.10(6)         | 0.10(7)                                                    | 48.9(2)       | 47.8(2)                                                    |
| 10 K            | 0.35(4)          | 0.79(4)                                                    | -0.01(7)         | 0.06(6)                                                    | 48.9(2)       | 48.4(2)                                                    |
| 33 GPa          |                  |                                                            |                  |                                                            |               |                                                            |
| 290 K<br>spinel | 0.26(8)          | 0.60(8)                                                    | -0.08(9)         | -0.12(9)                                                   | 47.8(6)       | 47.3(6)                                                    |
| post-spinel     | 0.34(7)          | 0.73(7)                                                    | -0.32(10)        | 0.66(10)                                                   | 40.2(8)       | 38.5(8)                                                    |
| 250 K           | 0.37(5)          | 0.68(5)                                                    | -0.52(10)        | 0.89(10)                                                   | 40.8(3)       | 40.5(3)                                                    |
| 200 K           | 0.40(5)          | 0.62(5)                                                    | -0.43(10)        | 0.78(10)                                                   | 43.8(3)       | 43.1(3)                                                    |
| 150 K           | 0.44(5)          | 0.67(5)                                                    | -0.47(9)         | 0.63(9)                                                    | 46.5(3)       | 45.9(3)                                                    |
| 100 K           | 0.50(5)          | 0.65(5)                                                    | -0.60(9)         | 0.63(9)                                                    | 48.2(2)       | 47.5(2)                                                    |
| 50 K            | 0.49(5)          | 0.69(5)                                                    | -0.52(7)         | 0.57(8)                                                    | 49.2(2)       | 48.2(2)                                                    |
| 10 K            | 0.29(5)          | 0.80(5)                                                    | -0.09(7)         | 0.14(7)                                                    | 48.9(2)       | 48.6(2)                                                    |
| 40 GPa          |                  |                                                            |                  |                                                            |               |                                                            |
| 290 K           | 0.39(5)          | 0.64(5)                                                    | -0.55(10)        | 0.77(1)                                                    | 41.2(3)       | 40.3(3)                                                    |
| 250 K           | 0.33(5)          | 0.64(5)                                                    | -0.66(10)        | 0.77(10)                                                   | 42.9(3)       | 41.9(3)                                                    |
| 200 K           | 0.42(4)          | 0.65(4)                                                    | -0.67(9)         | 0.71(9)                                                    | 45.2(3)       | 44.2(3)                                                    |
| 150 K           | 0.48(4)          | 0.67(4)                                                    | -0.62(9)         | 0.64(9)                                                    | 47.1(3)       | 46.1(3)                                                    |
| 100 K           | 0.46(3)          | 0.66(3)                                                    | -0.62(7)         | 0.59(7)                                                    | 48.4(2)       | 47.8(2)                                                    |
| 50 K            | 0.46(3)          | 0.67(3)                                                    | -0.55(7)         | 0.56(7)                                                    | 49.0(2)       | 48.4(2)                                                    |
| 10 K            | 0.48(3)          | 0.65(3)                                                    | -0.64(7)         | 0.57(7)                                                    | 49.1(2)       | 48.7(2)                                                    |

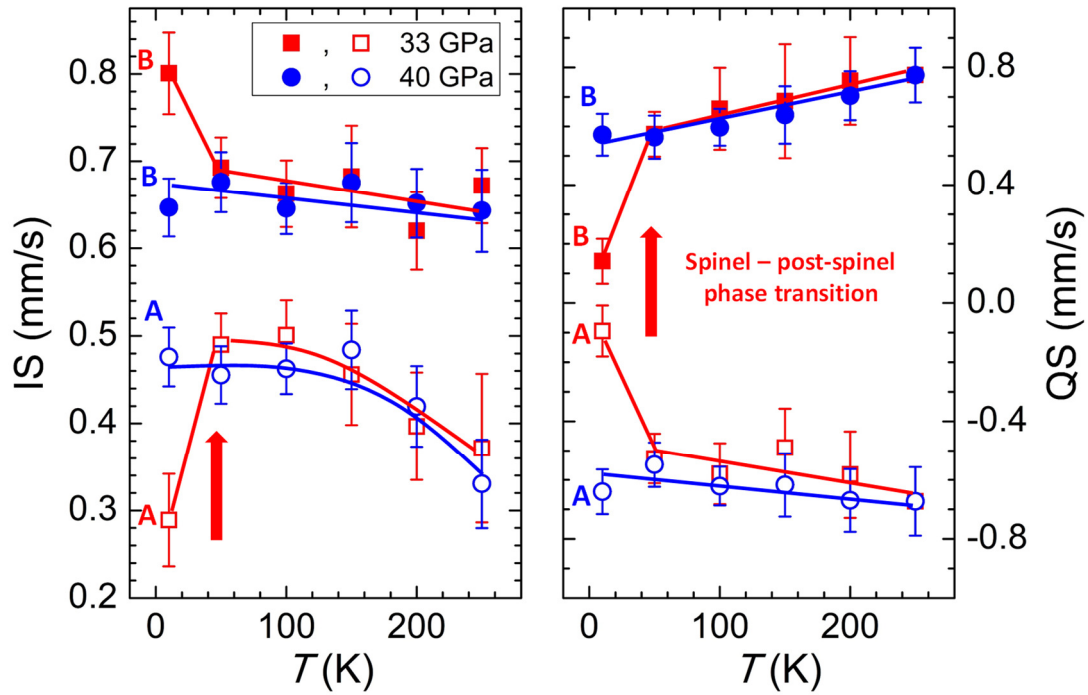

**Supplementary Figure 1.** Temperature behavior of the isomer shifts and quadrupole splittings of  $\text{Fe}_3\text{O}_4$  at  $P = 33$  and  $40$  GPa. The open and solid symbols correspond to (A) tetrahedral sites of iron in the spinel phase or bicapped trigonal prismatic sites in the post-spinel phase and (B) octahedral sites of iron in both phases. The spinel – post-spinel phase transition point is marked by arrow.

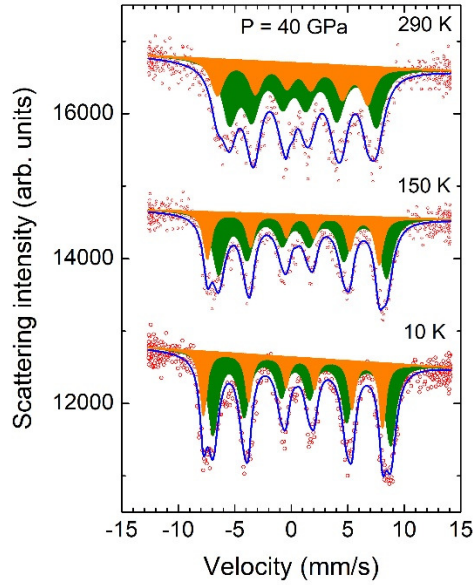

**Supplementary Figure 2.** The SMS spectra of  $\text{Fe}_3\text{O}_4$ , measured at  $P = 40$  GPa and selected temperatures. The experimental points, fitting curves and the sextet components, corresponding to the bicapped trigonal prismatic (orange color) and octahedral sites (olive color) in the post-spinel phase are presented.

### Supplementary Table 2

Structural parameters of the post-spinel phase of  $\text{Fe}_3\text{O}_4$  with the orthorhombic crystal structure of  $Bbmm$  symmetry at  $P = 33$  GPa and ambient temperature.

|                    |          | $a$ (Å)     | $b$ (Å)  | $c$ (Å)  |
|--------------------|----------|-------------|----------|----------|
| Lattice parameters |          | 9.246(5)    | 9.278(5) | 2.763(3) |
|                    |          | Coordinates |          |          |
| Atom type          | Position | $x$         | $y$      | $z$      |
| Fe1                | $4c$     | 0.377       | 0.25     | 0        |
| Fe2                | $8f$     | 0.131       | 0.077    | 0        |
| O1                 | $4b$     | 0.5         | 0        | 0        |
| O2                 | $4c$     | 0.033       | 0.25     | 0        |
| O3                 | $8f$     | 0.215       | 0.616    | 0        |
